# Supplementary material for: Natural wood-based triboelectric nanogenerators with high fire-safety for energy harvesting toward intelligent buildings
Source: Royal Society of Chemistry journal article supplement (doi:10.1039/d3ta05449g), 2023-01-01
Supplement: d3ta05449g1.pdf [file d3ta05449g1.pdf]

## Supplementary Information

### **Natural Wood-Based Triboelectric Nanogenerators with Highly Fire-Safety for Energy Harvesting toward Intelligent Building**

Bo Tang, Ze-Peng Deng, Jia-Min Wu, Yu-Yao Zhao, Qiang-Wu Tan, Fei Song\*, Xiu-Li Wang\*, Yu-Zhong Wang

The Collaborative Innovation Center for Eco-Friendly and Fire-Safety Polymeric Materials (MoE), National Engineering Laboratory of Eco-Friendly Polymeric Materials (Sichuan), State Key Laboratory of Polymer Materials Engineering, College of Chemistry, Sichuan University, Chengdu, 610064, China.

\* Corresponding authors: [songfei520@gmail.com](mailto:songfei520@gmail.com); [xiuliwang1@163.com](mailto:xiuliwang1@163.com)

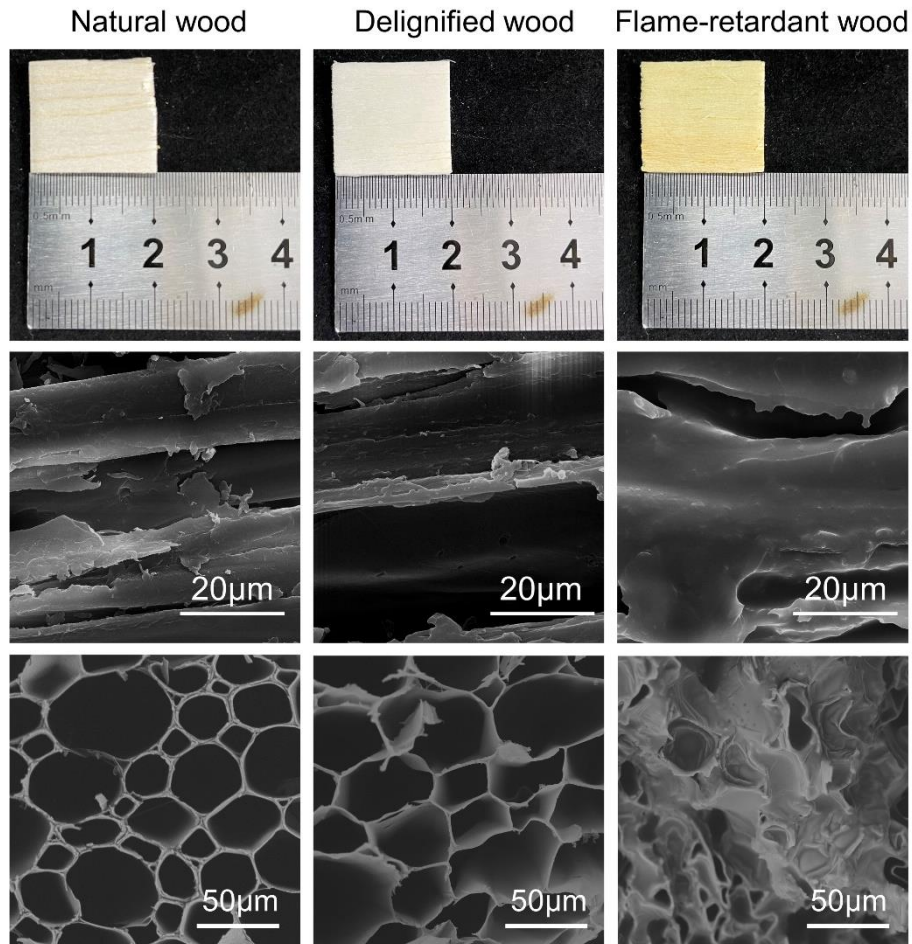

**Fig. S1** Digital photographs and SEM images of natural wood, delignified wood, and flame-retardant wood.

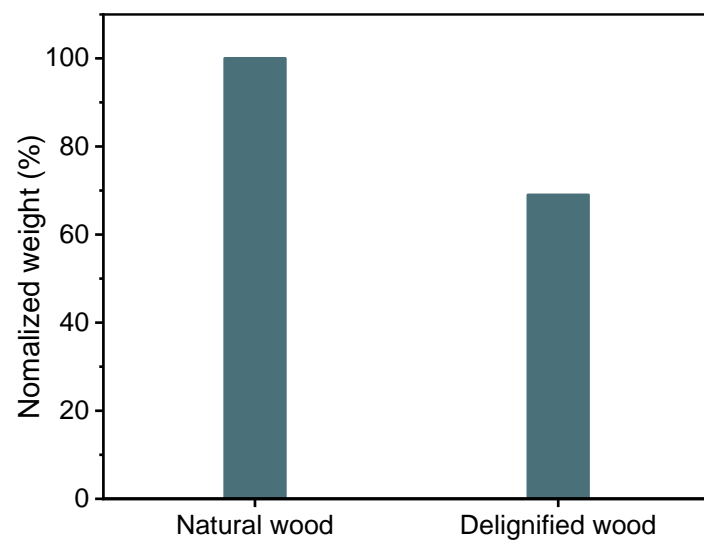

**Fig. S2** Normalized weight comparison of natural wood and delignified wood.

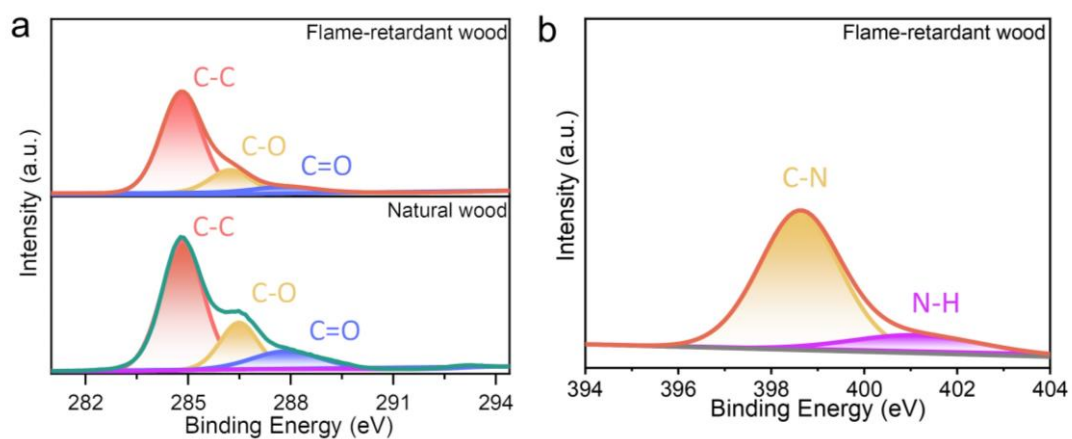

**Fig. S3** (a) C-spectrum of the natural and flame-retardant wood samples. (b) N-spectrum of flame-retardant wood.

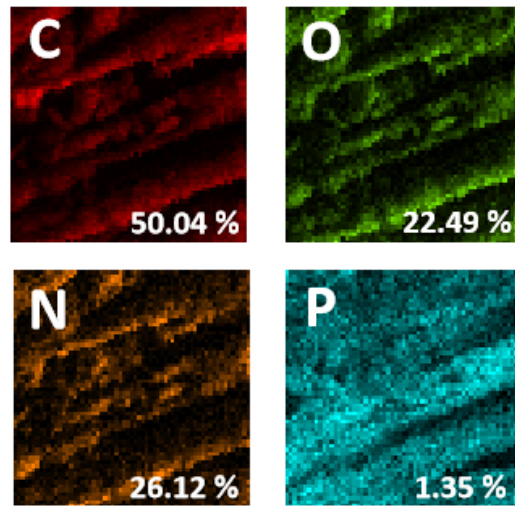

**Fig. S4** EDX mapping of the flame-retardant wood.

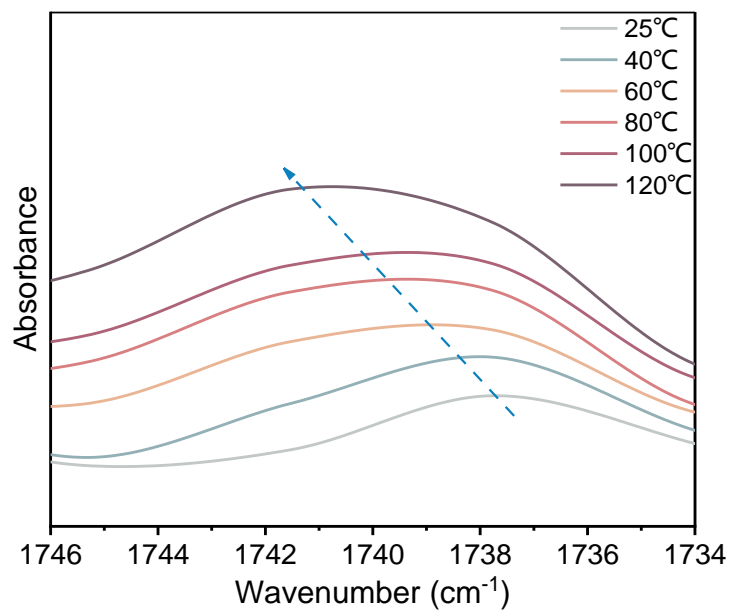

**Fig. S5** In situ FTIR spectra of flame-retardant wood recorded ranging the temperature from 25 to 120 °C.

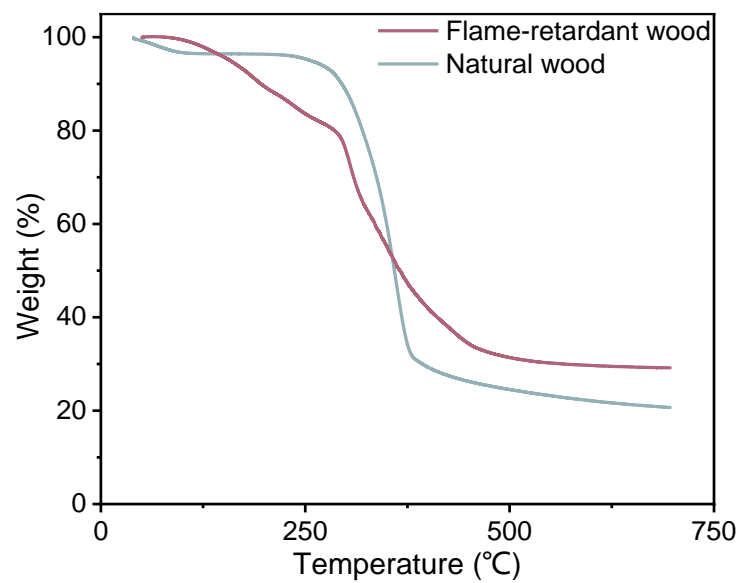

**Fig. S6** TGA curves of natural wood and flame-retardant wood under N<sub>2</sub> atmosphere.

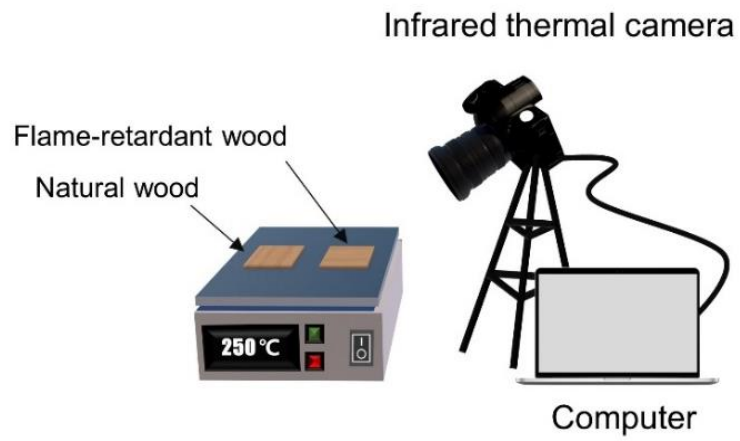

**Fig. S7** Schematic diagram of the thermal insulation test for the wood samples on a 250 °C hot plate.



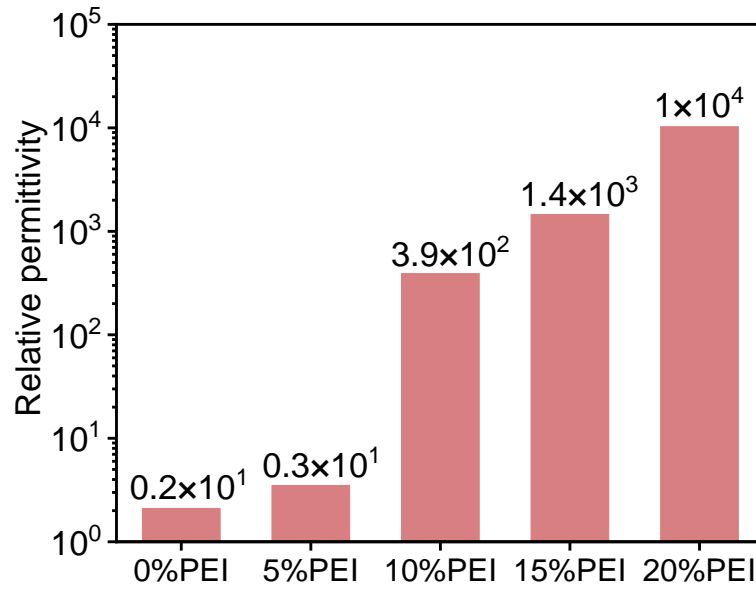

**Fig. S8** Relative permittivity of flame-retardant wood at a frequency of 1000 KHz.

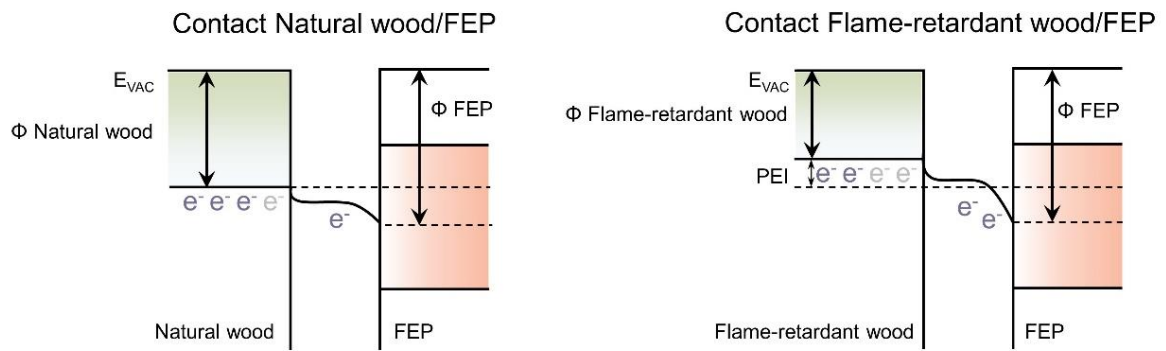

**Fig. S9** Energy band diagram of Natural wood and Flame-retardant wood during contact electrification with FEP.

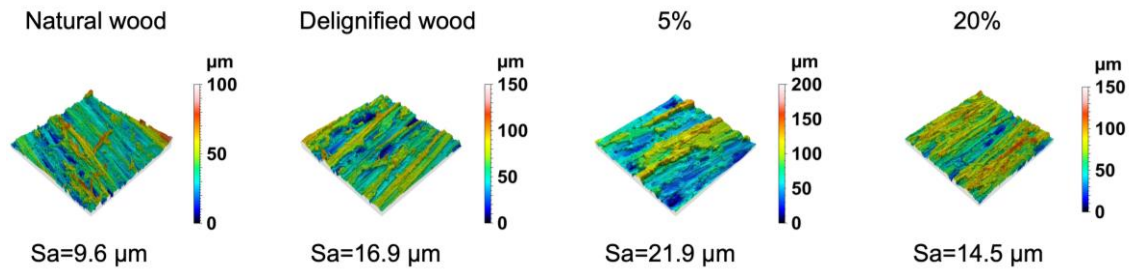

**Fig. S10** 3D surface profiling images of natural wood, delignified wood and flame-retardant woods.

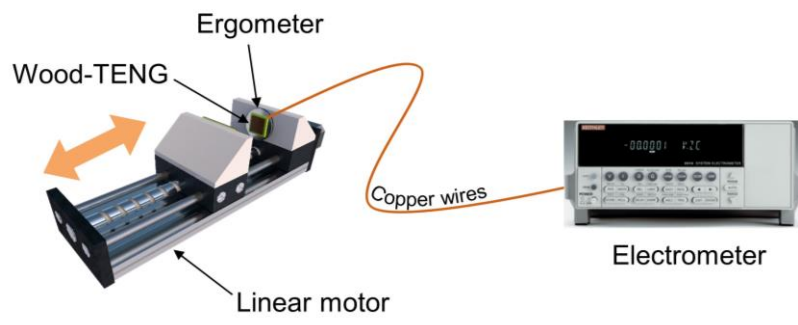

**Fig. S11** The schematic diagram of the experimental platform.

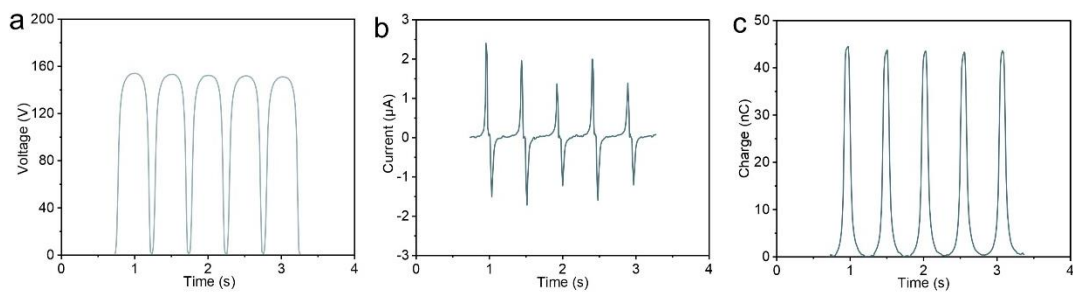

**Fig. S12 (a)** Open circuit voltage, **(b)** short-circuit currents, and **(c)** transferred charge of the FW-TENG prepared at the PEI concentration of 25 wt%.

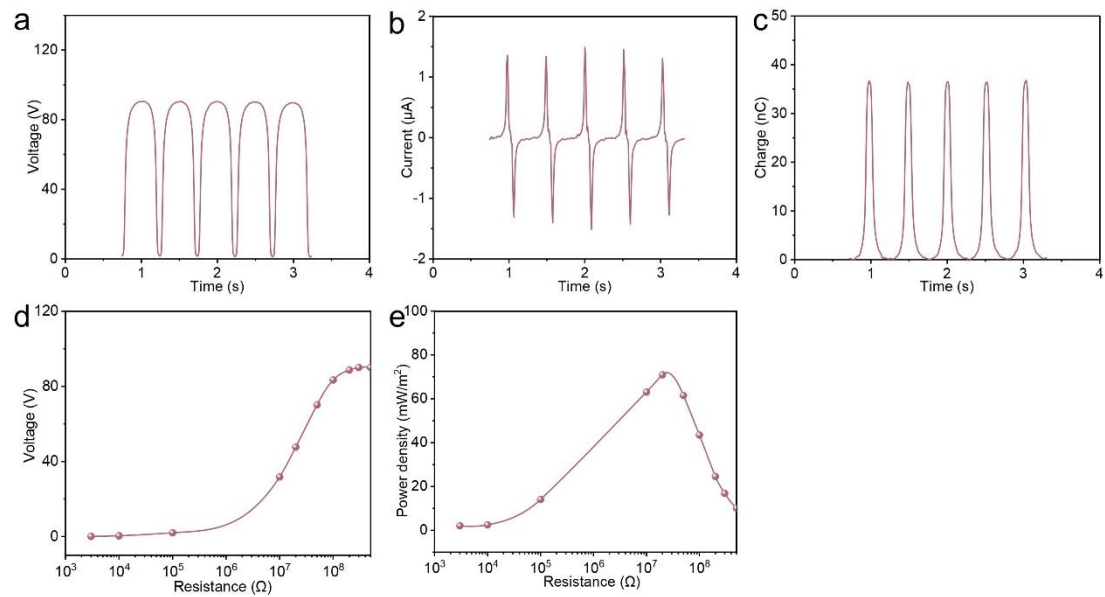

**Fig. S13 Output performance of the delignified wood based TENG. (a)** Open circuit voltage, **(b)** short-circuit currents, and **(c)** transferred charge of the delignified wood-based TENG. **(d)** Output voltages and **(e)** corresponding peak power density of the delignified wood-based TENG under different external load resistances.

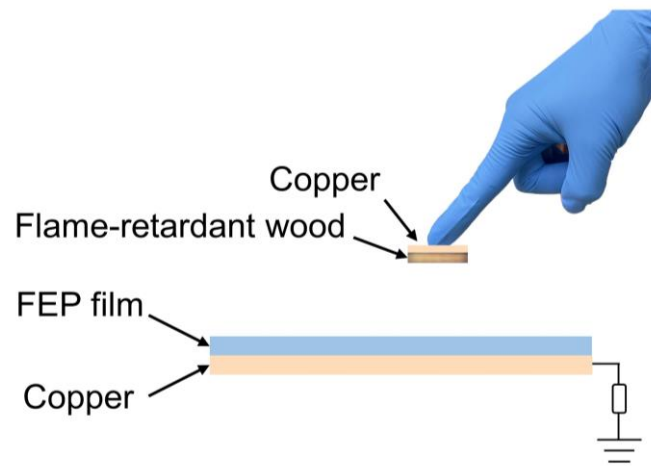

**Fig. S14** Schematic illustration of the TENG as a pressure sensor.

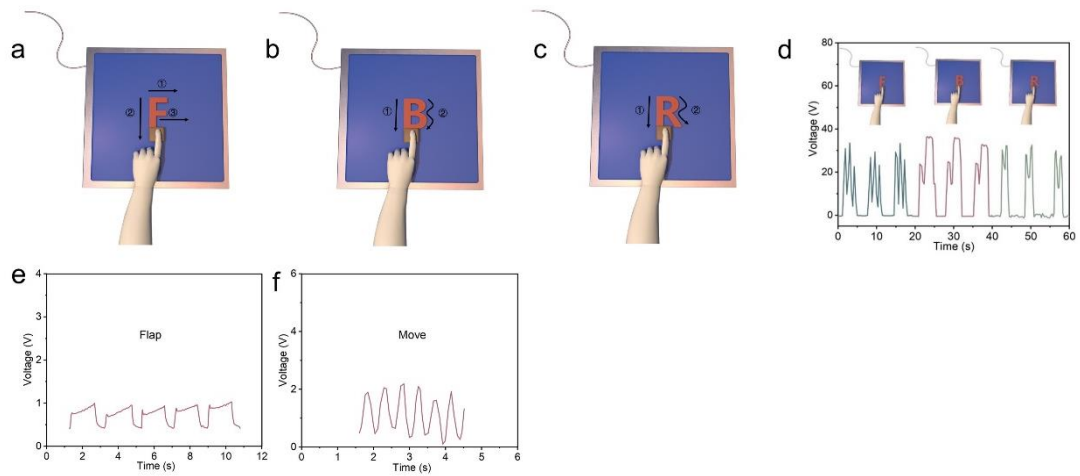

**Fig. S15 (a-c)** The trajectories and **(d)** voltage responses induced by writing different characters: “F” “B”, and “R”. Voltage responses induced by **(e)** flap and **(f)** move of a finger.



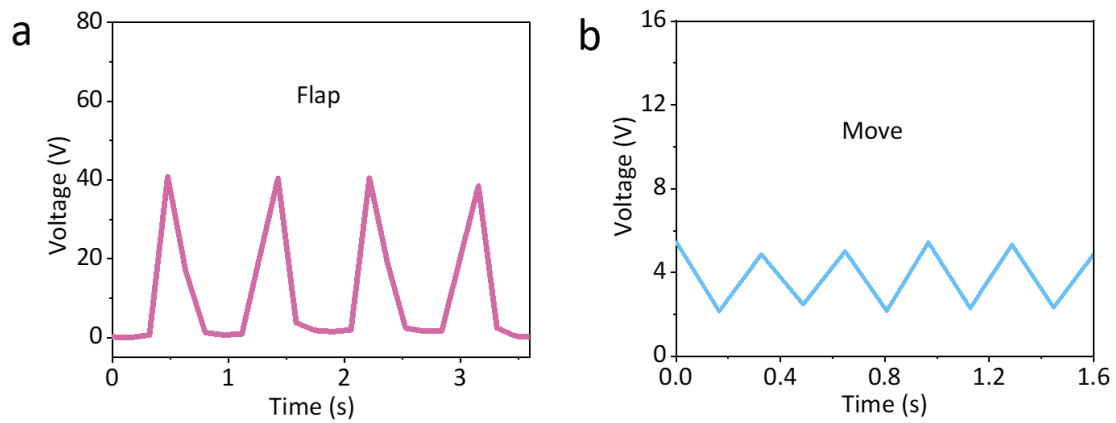

**Fig. S16** Voltage responses induced by (a) flap and (b) move.

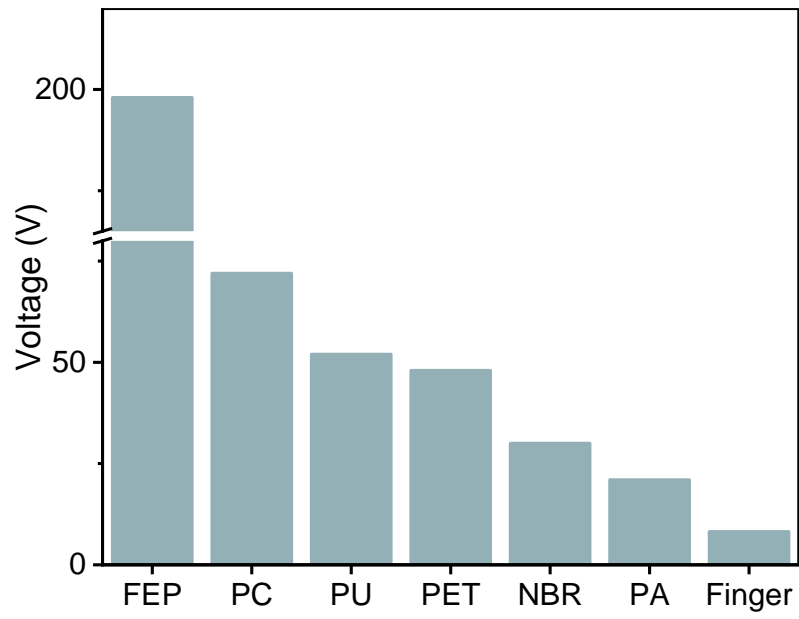

**Fig. S17** Voltages of the FW-TENG in response to different contact materials.

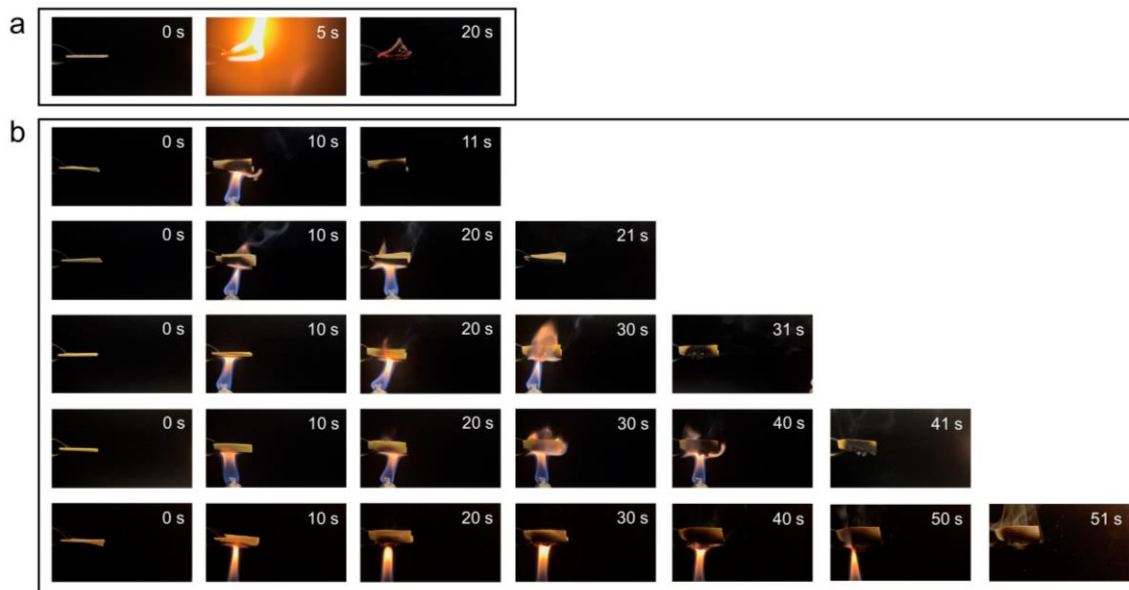

**Fig. S18** Horizontal burning test of (a) natural wood for 5 s and (b) flame-retardant wood for 10 s, 20 s, 30 s, 40 s and 50 s.

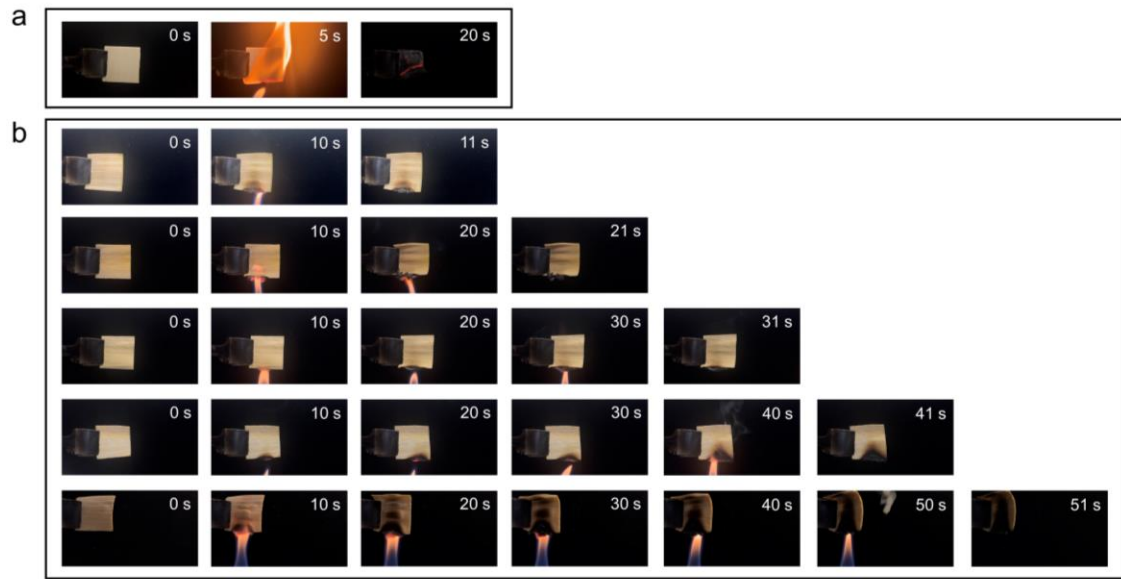

**Fig. S19** Vertical burning test of **(a)** natural wood for 5 s and **(b)** flame-retardant wood for 10 s, 20 s, 30 s, 40 s and 50 s.

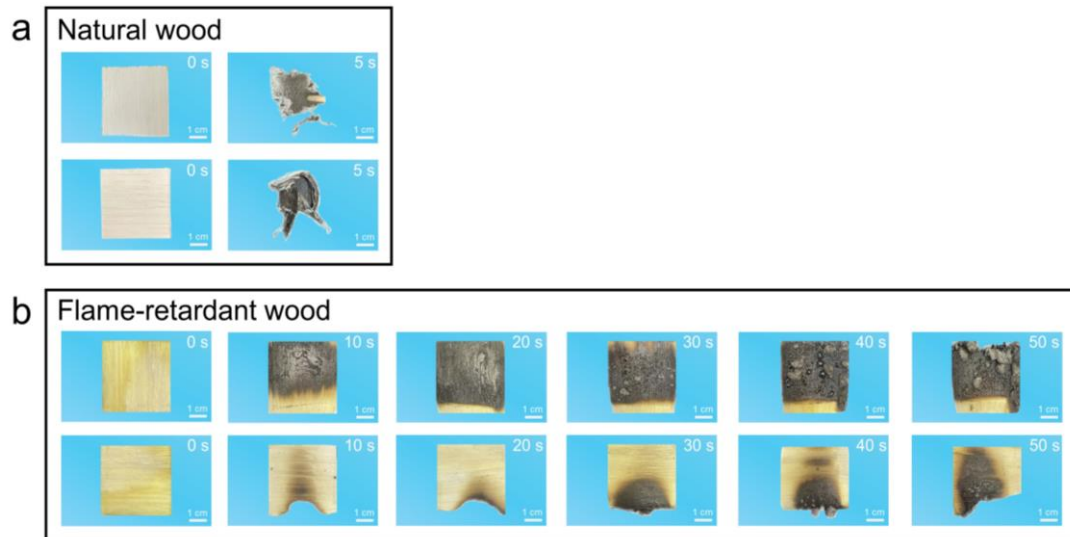

**Fig. S20** Photographs of **(a)** natural wood and **(b)** flame-retardant wood after burning test.

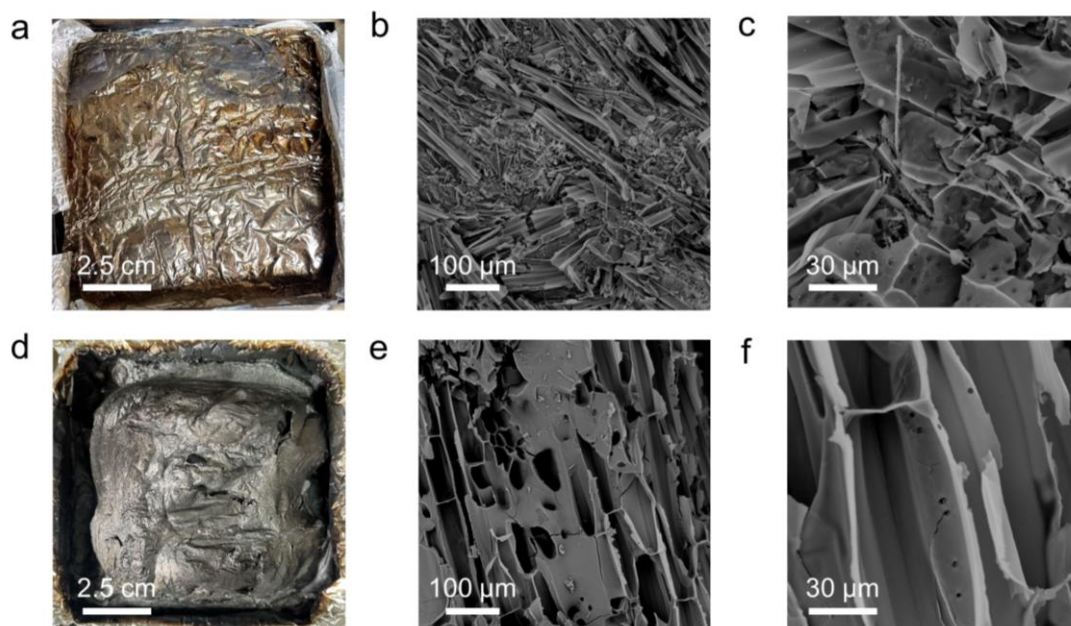

**Fig. S21** Digital photographs and SEM images of **(a-c)** natural and **(d-f)** flame-retardant wood after cone calorimeter test.

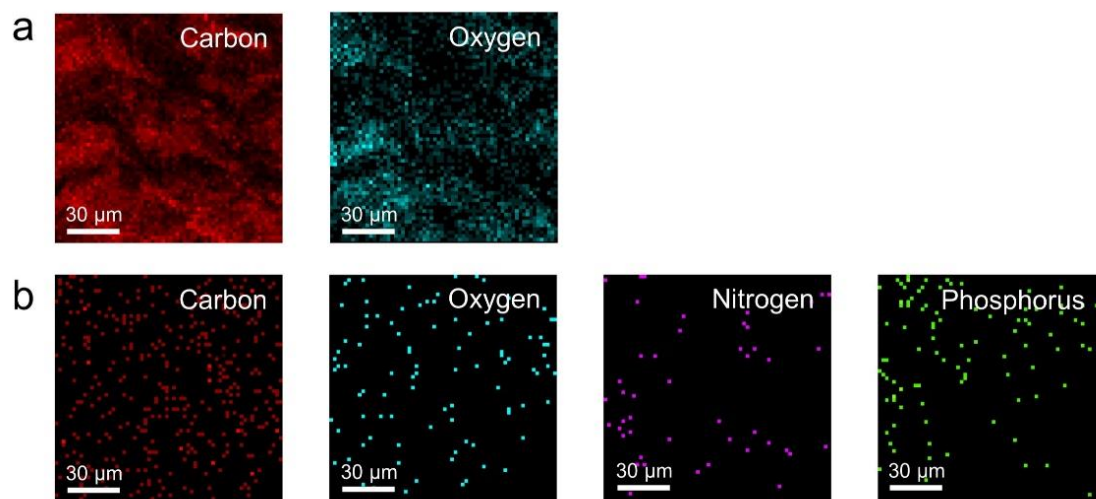

**Fig. S22** EDX mapping of the (a) natural and (b) flame-retardant wood after cone calorimeter test.

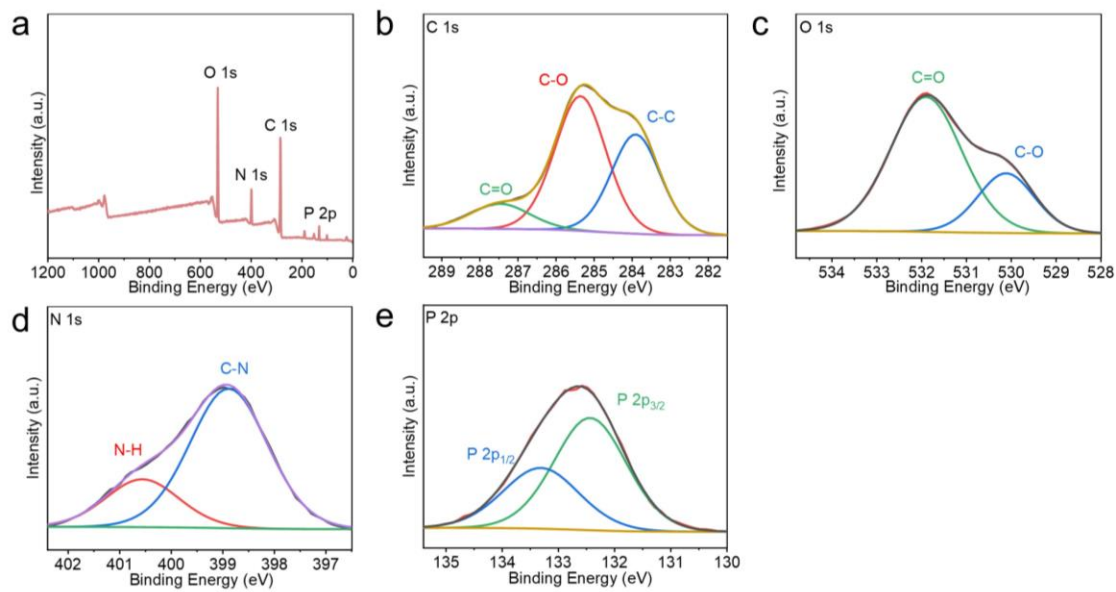

**Fig. S23** XPS spectra of the flame-retardant wood after cone calorimeter test.



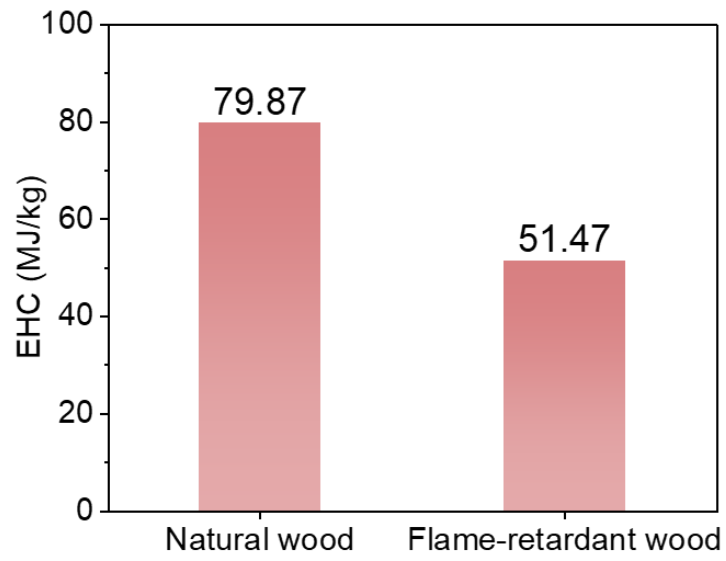

**Fig. S24** Comparison of the EHC between natural and flame-retardant wood.

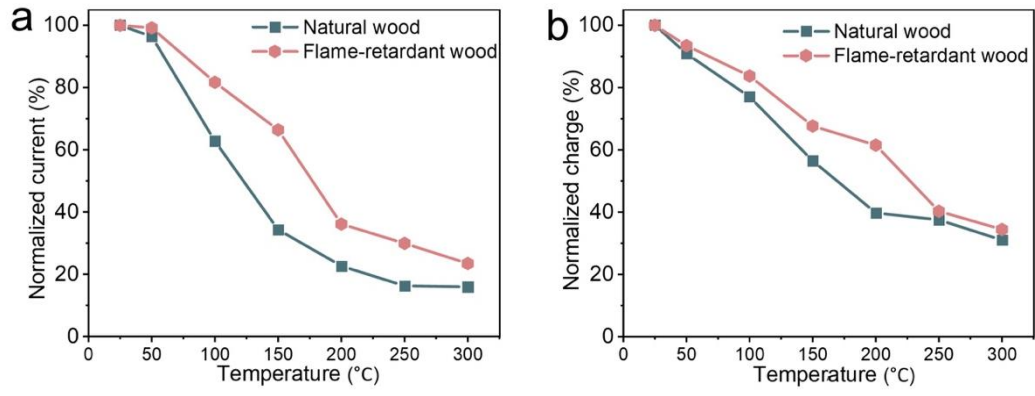

**Fig. S25** Normalized (a) current and (b) charge of the TENGs fabricated with natural wood and flame-retardant wood under different temperatures.

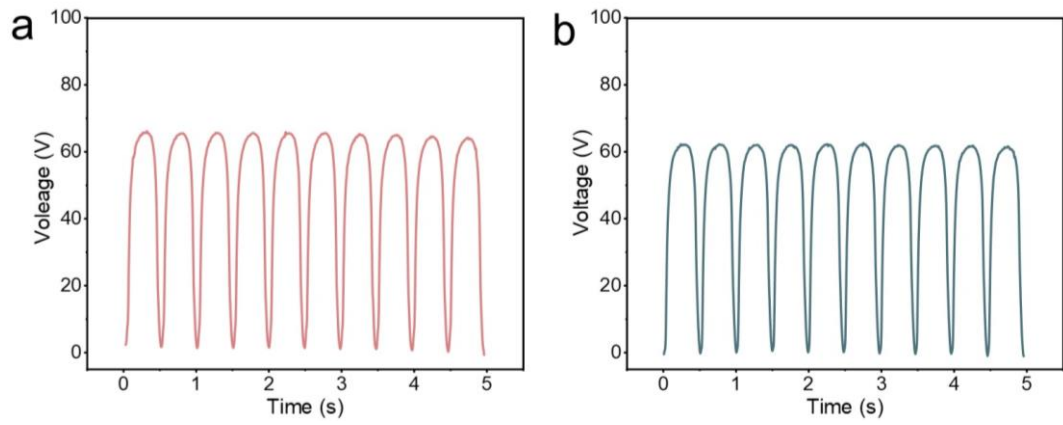

**Fig. S26** Voltage output of FW-TENGs after **(a)** burning horizontally and **(b)** burning vertically for 50 s.

**(a)** Acrylic

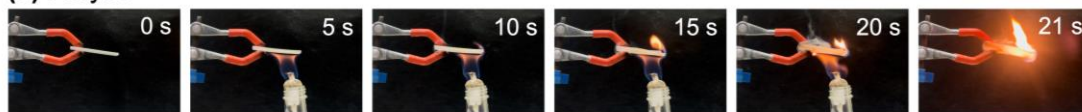

**(b)** Acrylic with flame-retardant wood

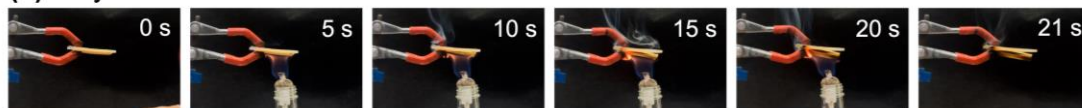

**Fig. S27** Horizontal burning test of **(a)** acrylic and **(b)** acrylic with flame-retardant wood.

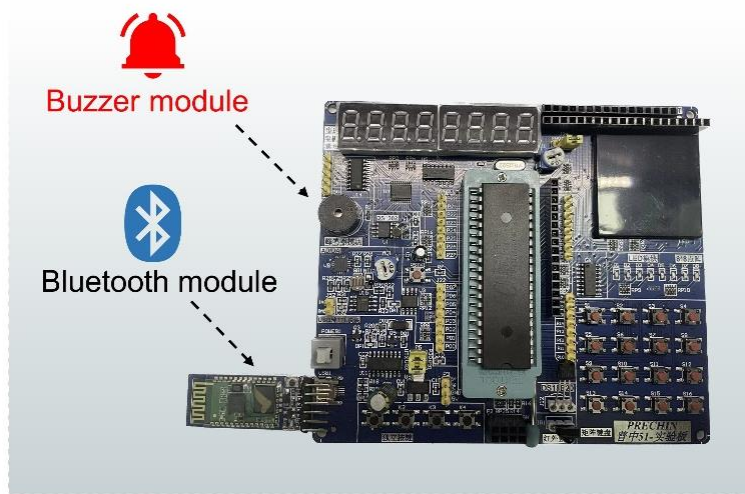

**Fig. S28** Photograph of the microcontroller, buzzer module and Bluetooth module.

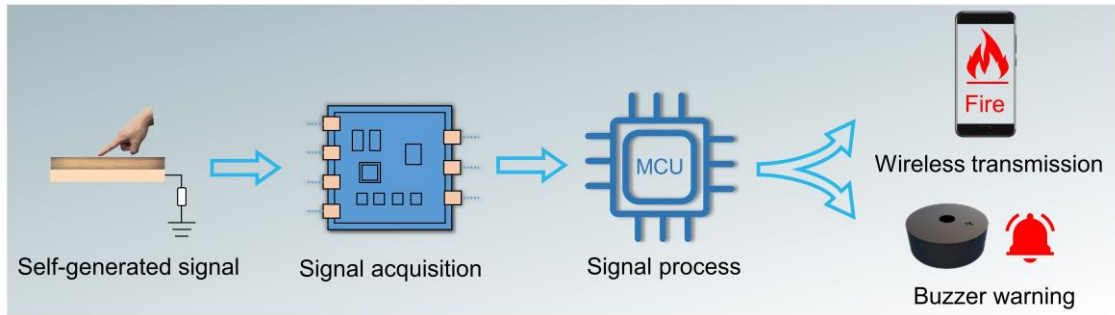

**Fig. S29** The operation mechanism of the self-powered wireless fire monitoring system.

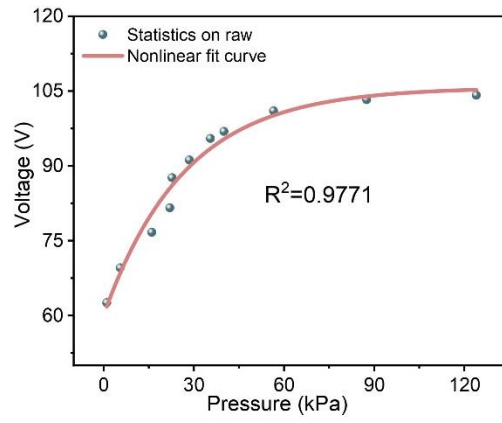

**Fig. S30** Relationship between voltage and pressure.

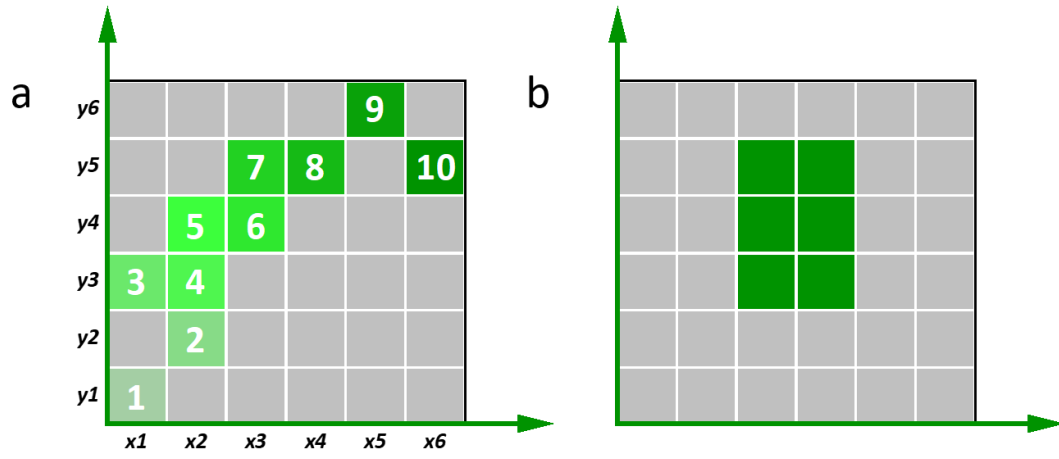

**Fig. S31** Path display of walking (a) and falling (b) on the smart floor.



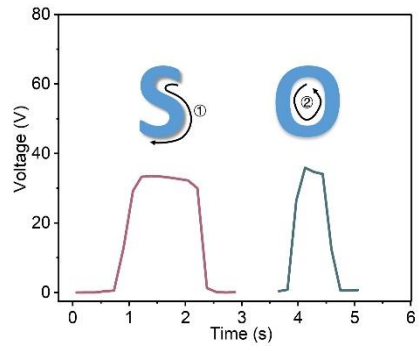

**Fig. S32** The trajectories and voltage responses induced by writing characters: “S” and “O”.

**Table S1** Atomic concentration of natural and flame-retardant wood from XPS measurement

| Samples | Elements             | C    | O    | N    | P    |
|---------|----------------------|------|------|------|------|
|         |                      | %    | %    | %    | %    |
|         | Natural wood         | 67.7 | 24.6 | 2.05 | 0.5  |
|         | Flame-retardant wood | 55.7 | 22.8 | 3.61 | 1.51 |

**Table S2** Comparison of FW-TENG with previously reported wood-based TENGs

| Voltage /V | Current/ uA | Charge Density/ $\mu\text{C} \cdot \text{m}^{-2}$ | Power Density/mW / $\text{m}^2$ | Frequency /Hz | Area/c $\text{m}^2$ | Pressure /N | Ref       |
|------------|-------------|---------------------------------------------------|---------------------------------|---------------|---------------------|-------------|-----------|
| 198        | 7.48        | 47                                                | 119.7                           | 2             | 4*4                 | 1           | This Work |
| 100        | 0.6         | 13.6                                              | 24.2                            | 1             | 5*5                 | 7.5         | [36]      |
| 80         | /           | /                                                 | 0.009                           | 8             | /                   | 20          | [61]      |
| 81         | 1.8         | 36                                                | 57                              | 1             | 3*3                 | 20          | [28]      |
| 220        | 5.6         | /                                                 | /                               | 40            | 8*8                 | /           | [62]      |
| 24.3       | 0.32        | 12                                                | 10.4                            | /             | 2*3.5               | 50          | [29]      |
| 45         | 1.5         | /                                                 | 0.6                             | /             | /                   | /           | [63]      |
| 90.1       | 0.458       | 71.5                                              | 54.53                           | 3             | 2*2                 | 8.2         | [25]      |
| 47         | 2.4         | 10                                                | /                               | 2             | 4*4                 | /           | [64]      |
| 227        | 4.8         | /                                                 | 18.86                           | /             | 10*8                | 180         | [30]      |
| 38         | 0.37        | /                                                 | /                               | 1             | 2*2                 | 1           | [27]      |
| 220        | 5.8         | /                                                 | 158.2                           | 2             | 8*8                 | /           | [65]      |

[61] D.G. Park, J.H. Hong, D.K. Choi, D.H. Kim, W.H. Jung, S.S. Yoon, K.H. Kim, S.P. An, Biocompatible and mechanically-reinforced tribopositive nanofiber mat for wearable and antifungal human kinetic-energy harvester based on wood-derived natural product, *Nano Energy*.96 (2022) 107091.

<https://doi.org/10.1016/j.nanoen.2022.107091>.

[62] C. He, W.J. Zhu, B.D. Chen, L. Xu, T. Jiang, C.B. Han, G.Q. Gu, D.C. Li, Z.L. Wang, Smart Floor with Integrated Triboelectric Nanogenerator As Energy Harvester and Motion Sensor,

ACS Appl. Mater. Interfaces. 31 (2017) 26126–26133.

<https://doi.org/10.1021/acsami.7b08526>.

[63] S. Bi, X. Han, Q.Q. Chen, B.H. Gao, L.H. Chen, Z.G. He, C.M. Jiang,

Ultralarge Curvature and Extreme Rapid Degradable Porous Wood Based Flexible Triboelectric Sensor for Physical Motion Monitoring, *Advanced Materials Technologies*. 8 (2023) 2201066.

<https://doi.org/10.1002/admt.202201066>

[64] C.C. Cai, J.L. Mo, Y.X. Lu, N. Zhang, Z.Y. Wu, S.F. Wang, S.X. Nie,

Integration of a porous wood-based triboelectric nanogenerator and gas sensor for real-time wireless food-quality assessment, *Nano Energy*. 83 (2021) 105833.

<https://doi.org/10.1016/j.nanoen.2021.105833>.

[65] S.F. Hao, J.Y. Jiao, Y.D. Chen, Z.L. Wang, X. Cao,

Natural wood-based triboelectric nanogenerator as self-powered sensing for smart homes and floors, *Nano Energy*. 75 (2020) 104957.

<https://doi.org/10.1016/j.nanoen.2020.104957>
